# Supplementary material for: In situ generated Fe3C embedded Fe–N-doped carbon nanozymes with enhanced oxidase mimic activity for total antioxidant capacity assessment
Source: Royal Society of Chemistry journal article supplement (doi:10.1039/d1tb02695j), 2022-01-01
Supplement: d1tb02695j1.pdf [file d1tb02695j1.pdf]

## Supporting Information

### In situ generated Fe<sub>3</sub>C embedded Fe-N-doped carbon nanozymes with enhanced oxidase mimic activity for total antioxidant capacity assessment

Rui Li<sup>+</sup>, Xiaohong Qiao<sup>+</sup>, Huijun Ma, Hanmei Li, Cong Li and Lihua Jin\*

Key Laboratory of Synthetic and Natural Functional Molecule Chemistry of the Ministry of Education, College of Chemistry & Materials Science, Northwest University, Xi'an 710069, People's Republic of China

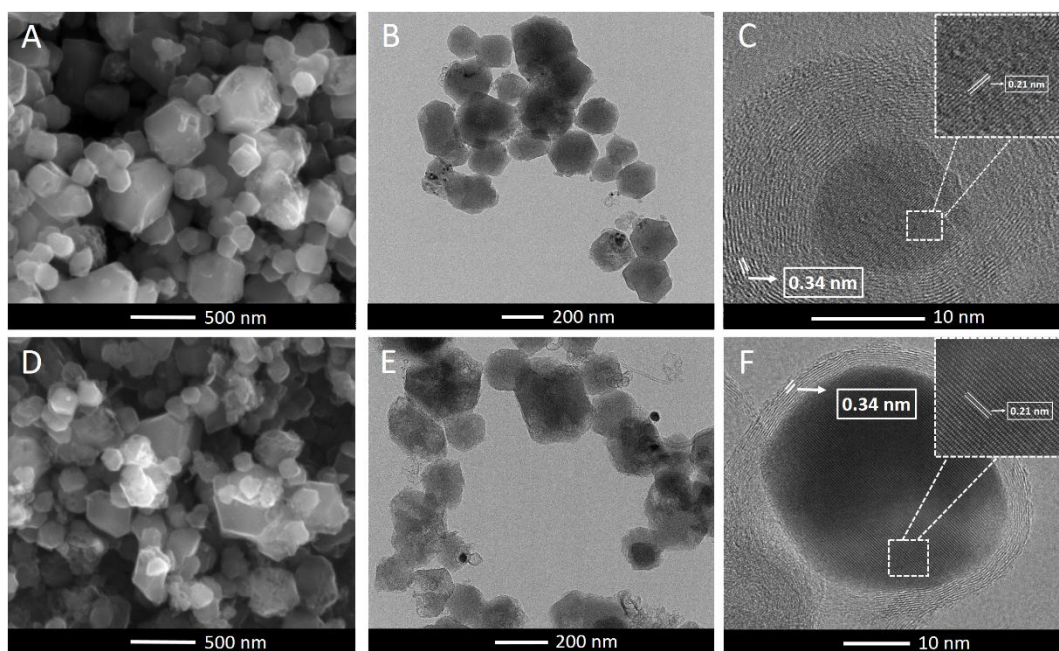

Fig. S1 SEM image, TEM image and HRTEM image of CMs-700 (A-C) and CMs-900(D-E).

\* To whom correspondence should be addressed. Fax: +86-029-88302635. E-mail: [jinlihua@nwu.edu.cn](mailto:jinlihua@nwu.edu.cn).

<sup>+</sup> These authors contributed equally.

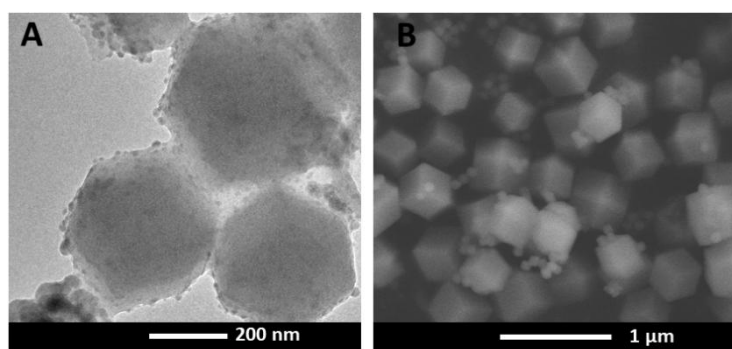

Fig. S2 SEM image (A) and TEM image (B) of ZIF framework

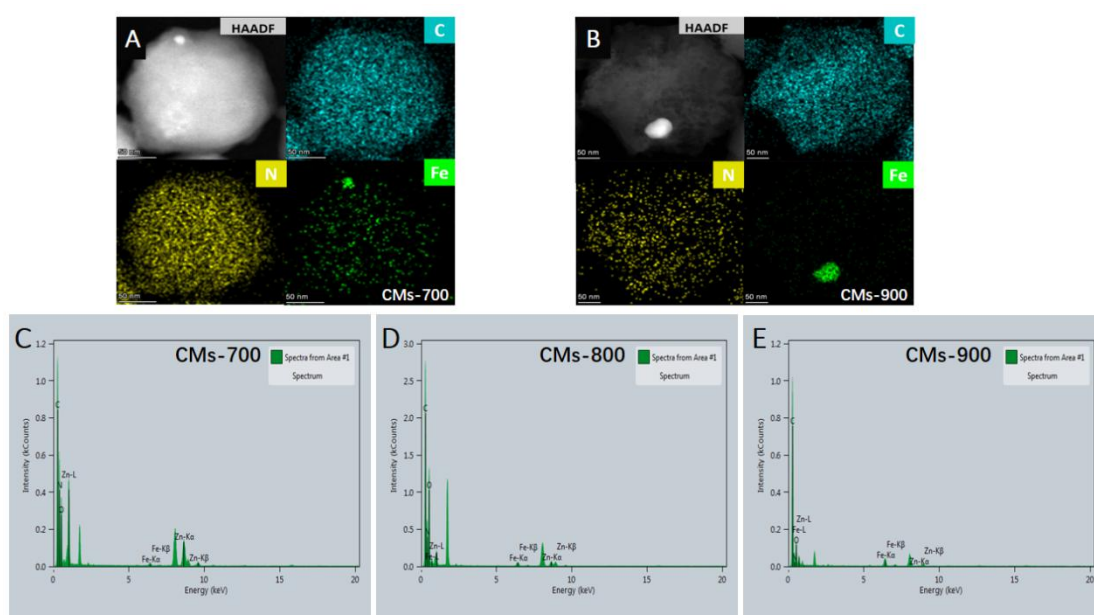

Fig. S3 Element mappings of CMS-700 (A) and CMS-800 (B); EDS images of CMS-700 (C), CMS-800 (D) and CMS-900(E).

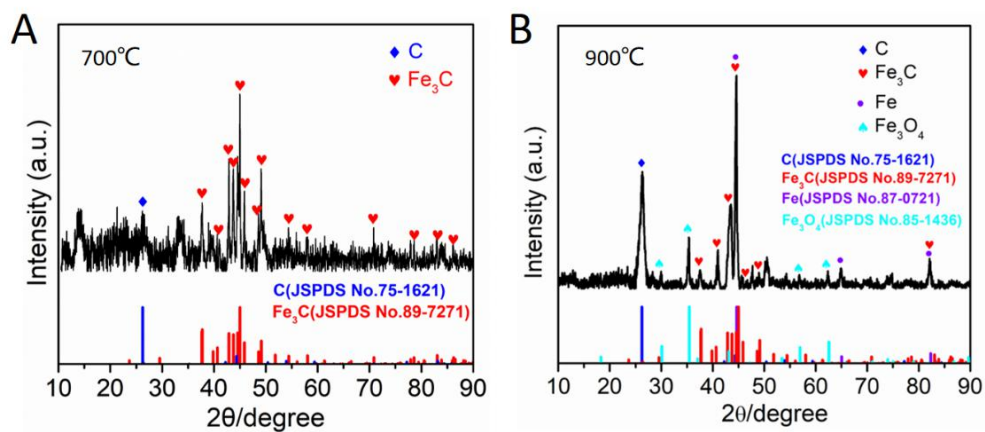

Fig. S4 XRD patterns of CMS-700 (A) and CMS-900 (B).

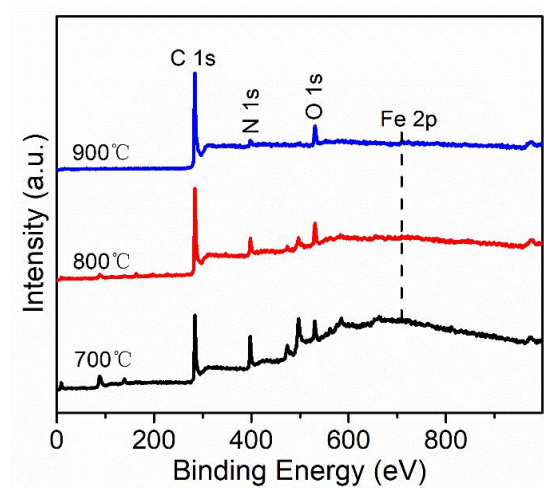

Fig. S5 The overview XPS spectra of the CMS-700, CMS-800 and CMS-900.

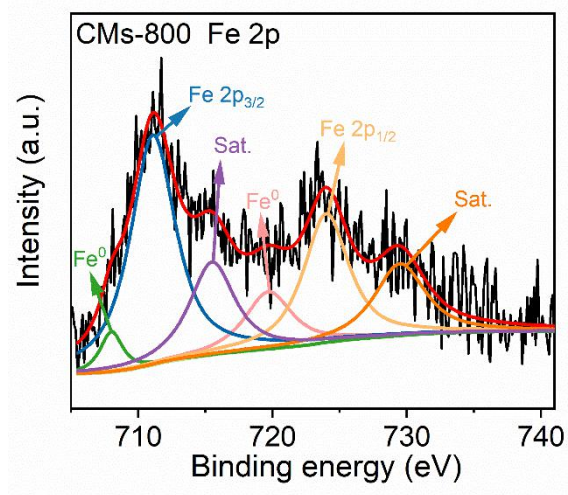

Fig. S6 High-resolution XPS Fe 2p spectra of CMs-800

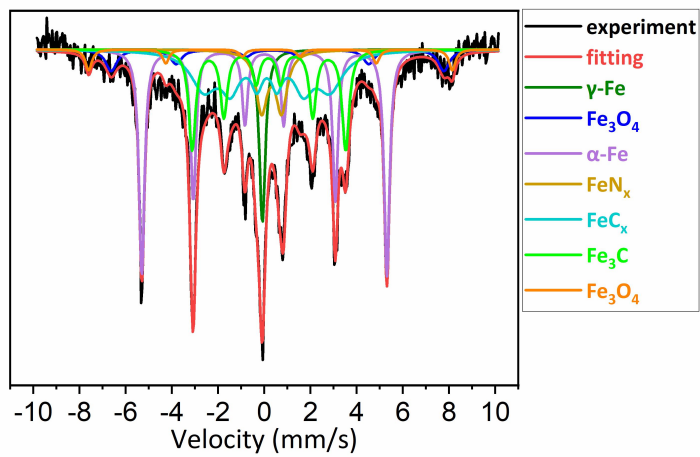

Fig. S7  $^{57}\text{Fe}$  Mössbauer fitted parameters of CMs-800

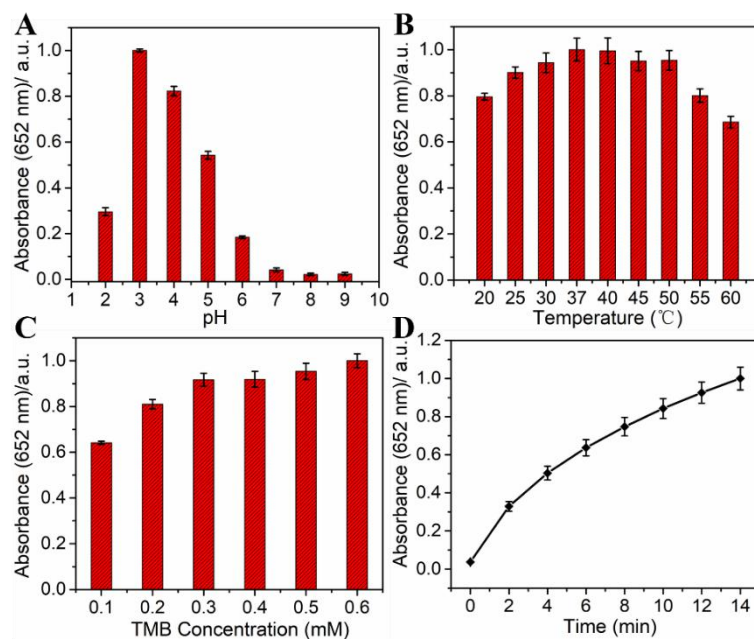

**Fig. S8** The effects of reaction condition on the oxidase mimic activity of CMs-800 (A) pH; (B) temperature; (C) TMB concentration; (D) reaction time.

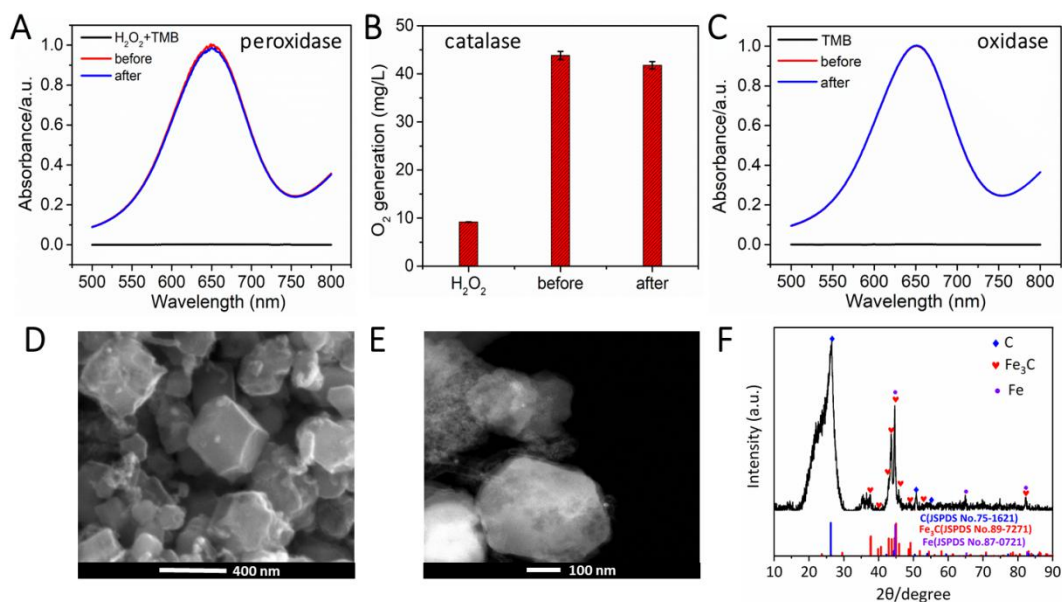

**Fig. S9** (A-C) The comparison of peroxidase-like, catalase-like and oxidase-like activities of CMs-800 before and after acid leaching experiment; (D-F) the SEM image, TEM image and XRD data of CMs-800 after acid leaching experiment.

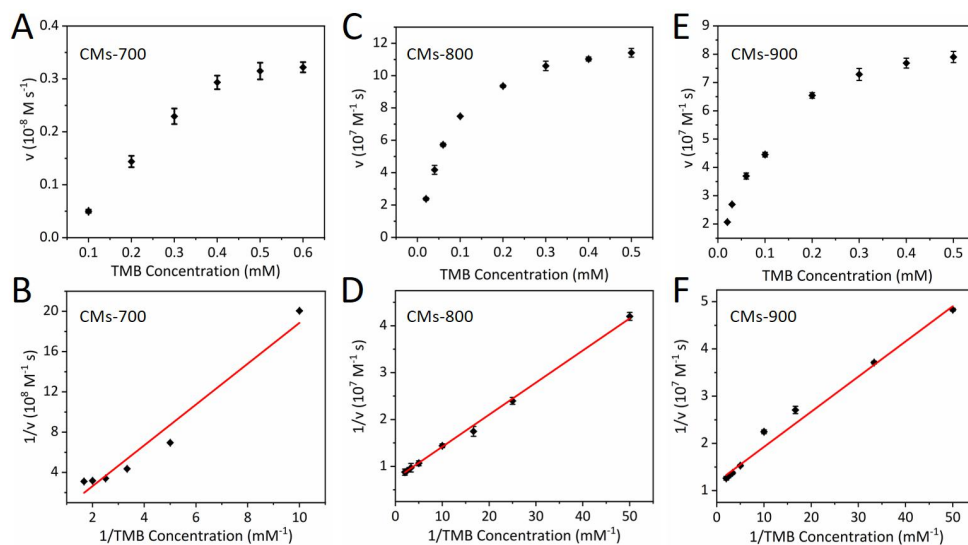

**Fig. S10** Oxidase mimic steady-state kinetic assay of the CMs-700(A), CMs-800(C) and CMs-900(E) for TMB. Line weaver-Burk plot of CMs-700(B), CMs-800(D) and CMs-900(F) for the variation of TMB.

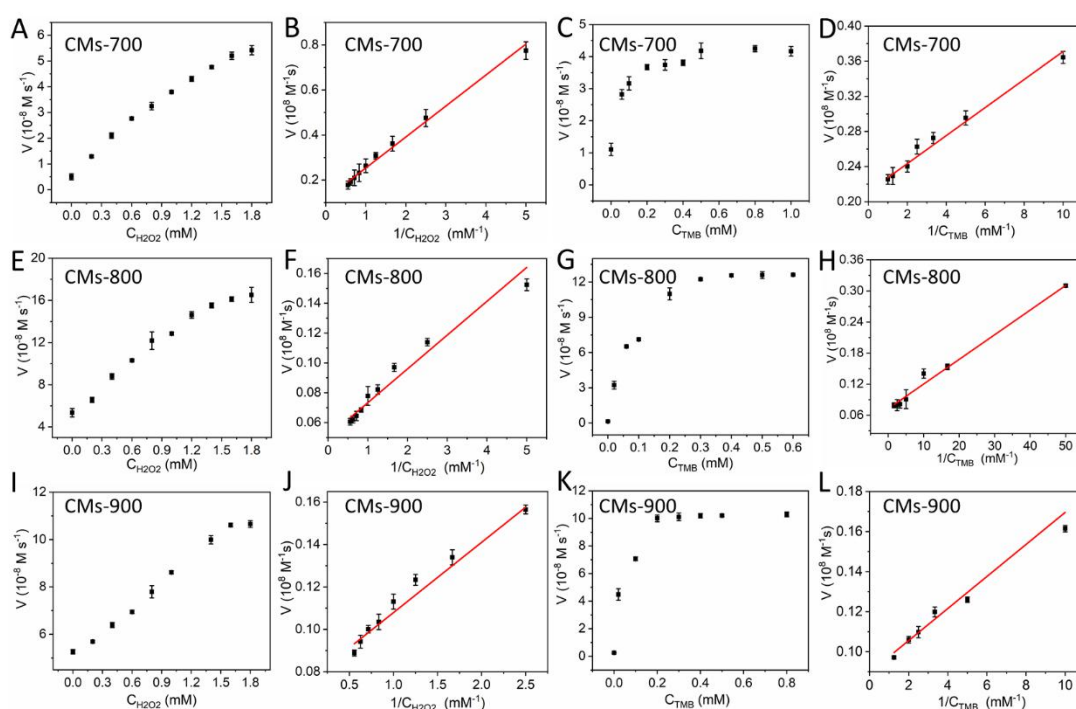

**Fig. S11** Peroxidase mimic steady-state kinetic assay of the CMs-700(A), CMs-800(E) and CMs-900(I) for  $\text{H}_2\text{O}_2$ ; Line weaver-Burk plot of CMs-700(B), CMs-800(F) and CMs-900(J) for the variation of  $\text{H}_2\text{O}_2$ ; peroxidase mimic steady-state kinetic assay of the CMs-700(C), CMs-800(G) and CMs-900(K) for TMB; Line weaver-Burk plot of CMs-700(D), CMs-800(H) and CMs-900(L) for the variation of TMB.

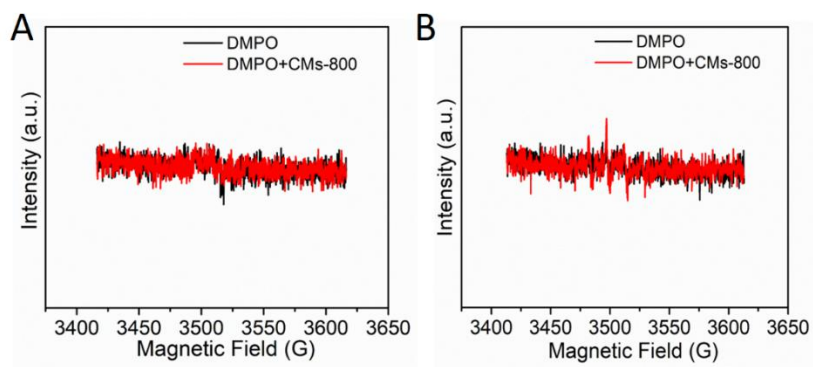

**Fig. S12** The EPR spectra of the (A) DMPO+CMs-800 aqueous solution, and (B) DMPO+CMs-800 methanol solution.

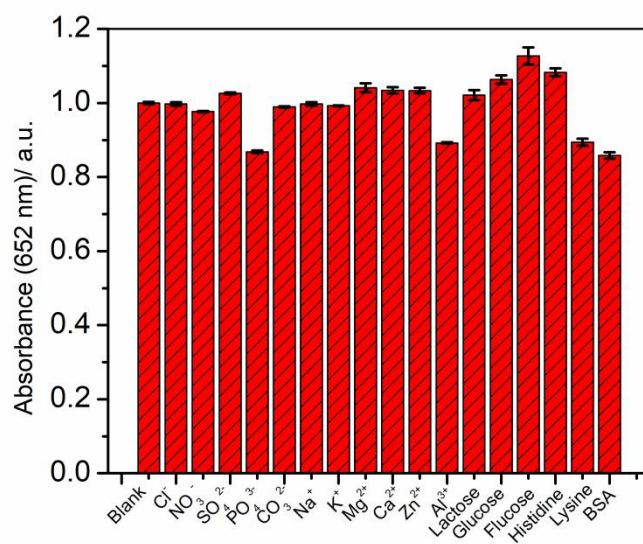

**Fig. S13** Selectivity of AA sensing system for common anions, cations and small molecules. All common anions, cations and small molecules were 1mM except BSA was 0.1 mg/mL.

**Table S1.**  $^{57}\text{Fe}$  Mössbauer fitted parameters of CMs-800.

| Catalyst | IS(mm·s <sup>-1</sup> ) | QS(mm·s <sup>-1</sup> ) | H(T)  | Phase                                            |
|----------|-------------------------|-------------------------|-------|--------------------------------------------------|
| CMs-800  | 0.18785                 | 0.02730                 | 20.66 | Fe <sub>3</sub> C                                |
|          | 0.1114                  | ~                       | 16.96 | FeC <sub>x</sub>                                 |
|          | 0.31537                 | 0.864                   | ~     | FeN <sub>x</sub>                                 |
|          | 0.00099                 | ~                       | 33.00 | α-Fe                                             |
|          | 0.46536                 | 0.22015                 | 44.78 | tetahed B-site of Fe <sub>3</sub> O <sub>4</sub> |
|          | 0.27929                 | -0.02579                | 48.94 | tetahed A-site of Fe <sub>3</sub> O <sub>4</sub> |

**Table S2** Comparison of oxidase-like steady-state kinetic parameter for Fe<sub>3</sub>C@Fe-N-CMs and other oxidase mimics.

| Nanozyme                        | Substrate | $K_m$ (mM) | $v_{\max}$ (10 <sup>-8</sup> M s <sup>-1</sup> ) | [E](μg/mL)         | Reference |
|---------------------------------|-----------|------------|--------------------------------------------------|--------------------|-----------|
| N-PCNSs-3                       |           | 0.084      | 0.42                                             | 25                 | [1]       |
| Fe SAEs                         |           | 0.13       | 2.25                                             | 20                 | [2]       |
| CeO <sub>2</sub> NRs-MOF/Cr(VI) |           | 0.108      | 0.977                                            | 1000               | [3]       |
| Iron alkoxide                   |           | 0.12       | 2.11                                             | —                  | [4]       |
| Fe-Co-LDH                       |           | 0.34       | 5.4                                              | 33                 | [5]       |
| MOF(Co/2Fe)                     |           | 0.199      | 0.39                                             | 20                 | [6]       |
| Pt NCs                          |           | 0.63       | 2.7                                              | —                  | [7]       |
| AWNRs-9                         | TMB       | 0.109      | 2.17                                             | 50                 | [8]       |
| Nanoceria                       |           | 0.42       | 10.04                                            | 5×10 <sup>-5</sup> | [9]       |
| Fe/NC-800                       |           | 0.170      | 8.9                                              | 5.0                | [10]      |
| Commercial Pt/C                 |           | 0.129      | 5.2                                              | —                  | [11]      |
| FeN <sub>5</sub> SA/CNF         |           | 0.148      | 75.8                                             | 5.0                |           |
| CMs-700                         |           | 1.4        | 0.7                                              | 2.0                | This work |
| CMs-800                         |           | 0.095      | 14.1                                             | 2.0                | This work |
| CMs-900                         |           | 0.063      | 8.5                                              | 2.0                | This work |

$K_m$  is the Michaelis constant,  $v_{\max}$  is the maximal reaction velocity and  $k_{\text{cat}}$  is the catalytic constant, where  $k_{\text{cat}} = v_{\max}/[E]$ , [E] is the molar concentration of metal in nanozymes.



**Table S3.** The peroxidase-like enzyme kinetic parameters of Fe<sub>3</sub>C@Fe-N-CMs

| Catalyst | $K_m$ (mM) |                               | $v_{max}$ ( $10^{-8}M s^{-1}$ ) |                               | [E]( $\mu g/mL$ ) |
|----------|------------|-------------------------------|---------------------------------|-------------------------------|-------------------|
|          | TMB        | H <sub>2</sub> O <sub>2</sub> | TMB                             | H <sub>2</sub> O <sub>2</sub> |                   |
| CMS-700  | 1.183      | 1.183                         | 4.73                            | 8.66                          | 2.0               |
| CMS-800  | 0.0651     | 0.447                         | 18.70                           | 19.73                         | 2.0               |
| CMS-900  | 0.0893     | 0.442                         | 11.13                           | 13.37                         | 2.0               |

$K_m$  is the Michaelis constant,  $v_{max}$  is the maximal reaction velocity and  $k_{cat}$  is the catalytic constant, where  $k_{cat} = v_{max}/[E]$ , [E] is the molar concentration of metal in nanozymes.

**Table S4.** Recovery experiment of AA in diluted commercial vitamin drink

| Sample | Original ( $\mu M$ ) | Added ( $\mu M$ ) | Found (U/L) | Recovery (%) | RSD(%, n=3) |
|--------|----------------------|-------------------|-------------|--------------|-------------|
| 1      | 67.92                | 10.00             | 10.16       | 101.6        | 3.5         |
| 2      | 67.92                | 20.00             | 20.54       | 102.7        | 2.8         |
| 3      | 67.92                | 30.00             | 30.38       | 101.3        | 4.3         |

---

## Reference

- [1] K. Fan, J. Xi, L. Fan, P. Wang, C. Zhu, Y. Tang, X. Xu, M. Liang, B. Jiang, X. Yan and L. Gao, In vivo guiding nitrogen-doped carbon nanozyme for tumor catalytic therapy. *Nat. Commun.*, **2018**, 9, 1440.
- [2] Wang, M. K.; Zhou, X. B.; Wang, S.; Xie, X. L.; Wang, Y. F.; Su, X. G., Fabrication of bioresource-derived porous carbon-supported iron as an efficient oxidase mimic for dual-channel biosensing. *Anal. Chem.*, **2021**, 93, 3130-3137.
- [3] Wan, G.Y.; Liang, R. P.; Qiu, J. D., Nanoceria-templated metal organic frameworks with oxidase-mimicking activity boosted by hexavalent chromium. *Anal. Chem.*, **2020**, 92, 2339-2346.
- [4] Xu, X. C.; Luo, J. L.; Wei, S. T.; Zou, X. B.; Niu, X. H.; Pan, J. M., Three-dimensional flower-like multifunctional adsorbents with excellent sorptive removal and colorimetric detection of arsenate. *Chem. Eng. J.*, **2020**, 398, 125649.
- [5] Xu, X. C.; Zou, X. B.; Wu, S. W.; Wang, L. J.; Pan, J. M.; Xu, M. J.; Shan, W.; Li, X.; Niu, X. H., Colorimetric determination of As(III) based on 3-mercaptopropionic acid assisted active site and interlayer channel dual-masking of Fe-Co-layered double hydroxides with oxidase-like activity. *Microchim. Acta*, **2019**, 186, 815.
- [6] Yang, H. G.; Yang, R. T.; Zhang, P.; Qin, Y. M.; Chen, T.; Ye, F. G., A bimetallic (Co/2Fe) metal-organic framework with oxidase and peroxidase mimicking activity for colorimetric detection of hydrogen peroxide. *Microchim. Acta*, **2017**, 184, 4629-4635.
- [7] Yu, C. J.; Chen, T. H.; Jiang, J. Y.; Tseng, W. L., Lysozyme-directed synthesis of platinum nanoclusters as a mimic oxidase. *Nanoscale*, **2014**, 6, 9618-9624.
- [8] Ju, P.; Wang, Z.; Zhang, Y.; Zhai, X. F.; Jiang, F. H.; Sun, C. J.; Han, X. X., Enhanced oxidase-like activity of Ag@Ag<sub>2</sub>WO<sub>4</sub> nanorods for colorimetric detection of Hg<sup>2+</sup>. *Colloids Surfaces A*, **2020**, 603, 125203.
- [9] Cheng, H. J.; Lin, S. C.; Muhammad F.; Lin, Y. W.; Wei, H., Rationally modulate the oxidase-like activity of nanoceria for self-regulated bioassays. *ACS Sensors*, **2016**, 1, 1336-1343.
- [10] Chen, Q.M.; Liang, C.H.; Zhang, X.D.; Huang, Y.M.; High oxidase-mimic activity of Fe nanoparticles embedded in an N-rich porous carbon and their application for sensing of dopamine, *Talanta*, **2018**, 182, 476-483.
- [11] Huang, L.; Chen, J.X.; Gan, L.F.; Wang, J.; Dong, S.J.; Single-atom nanozymes, *Sci. Adv.* **2019**, 5, eaav5490.
